# Supplementary material for: Atorvastatin downregulates co-inhibitory receptor expression by targeting Ras-activated mTOR signalling
Source: PubMed Central journal article supplement (PMC5716724; doi:10.18632/oncotarget.21003), 2017-09-18
Supplement: oncotarget-08-98215-s001.pdf [file oncotarget-08-98215-s001.pdf]

## Atorvastatin downregulates co-inhibitory receptor expression by targeting Ras-activated mTOR signalling

### SUPPLEMENTARY MATERIALS

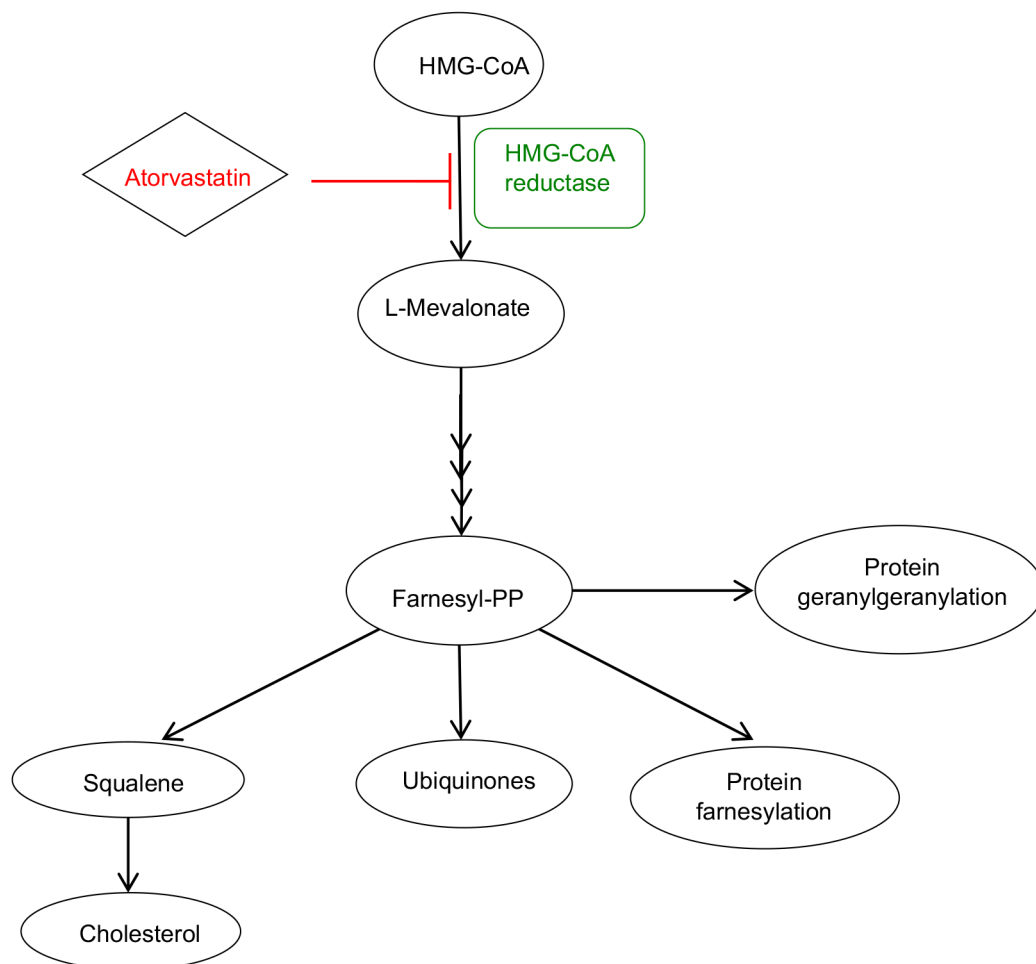

#### Supplementary Figure 1: Schematic representation of L-Mevalonate metabolism and downstream metabolites.

Hydroxy-methyl glutaryl Coenzyme A reductase (HMG-CoA reductase), the target enzyme for statins like Atorvastatin, converts HMG-CoA into L-Mevalonate. L-Mevalonate is the main substrate of downstream biochemical compounds (cholesterol, ubiquinones) with essential role in biological activities of the cells. Farnesyl pyrophosphate (Farnesyl-PP) downstream of L-mevalonate influences the induction of multiple molecules as shown.

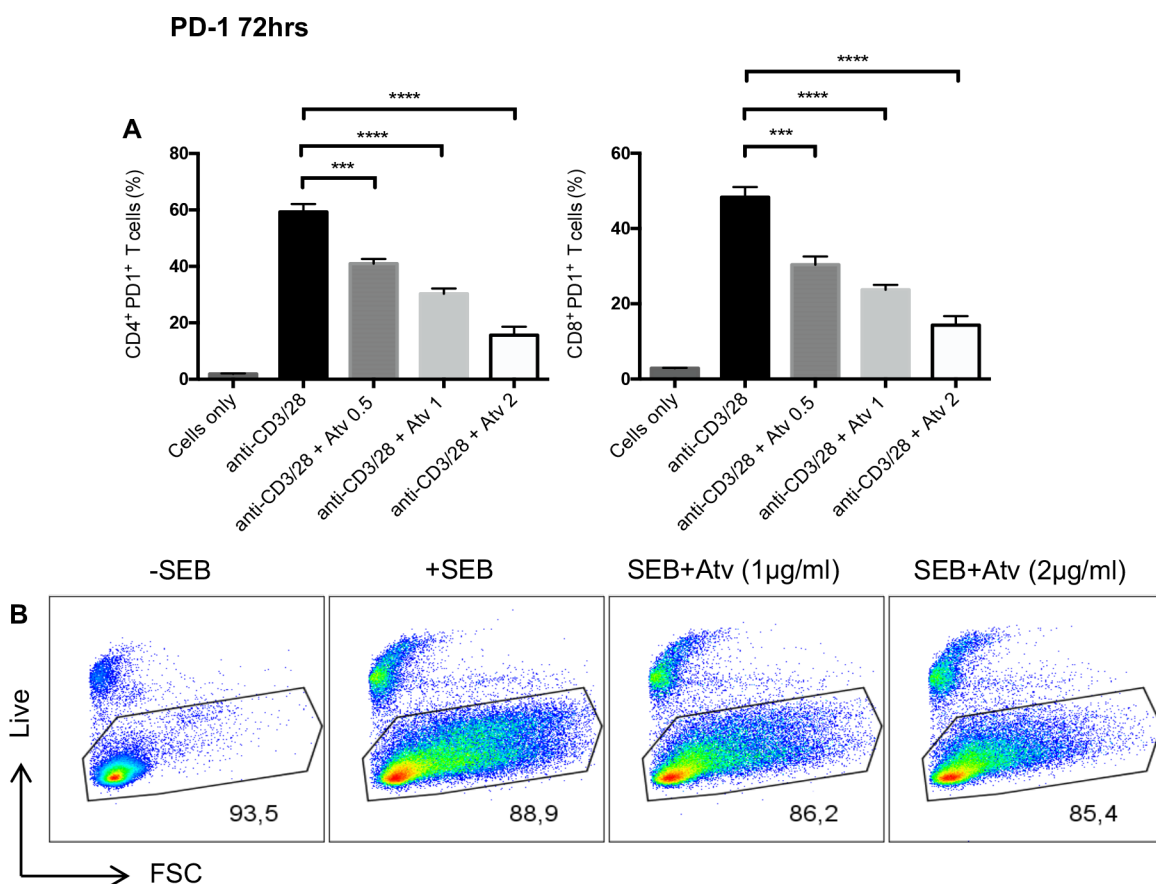

**Supplementary Figure 2: Expression of co-inhibitory receptors by stimulated T cells in response to atorvastatin treatment.** (A) Bar graphs showing cumulative expression of PD-1 by CD4+ (left) and CD8+ (right) T cells after  $\alpha$ -CD3/CD28 stimulation for 72hrs with increasing doses of atorvastatin (0.5, 1 and 2µg/ml). (B) Representative dot plots showing percentage of live cells from unstimulated, SEB-stimulated and SEB-stimulated plus atorvastatin-treated cultures. P values are defined by \*\*\* (P < 0.001) and \*\*\*\* (P < 0.0001).

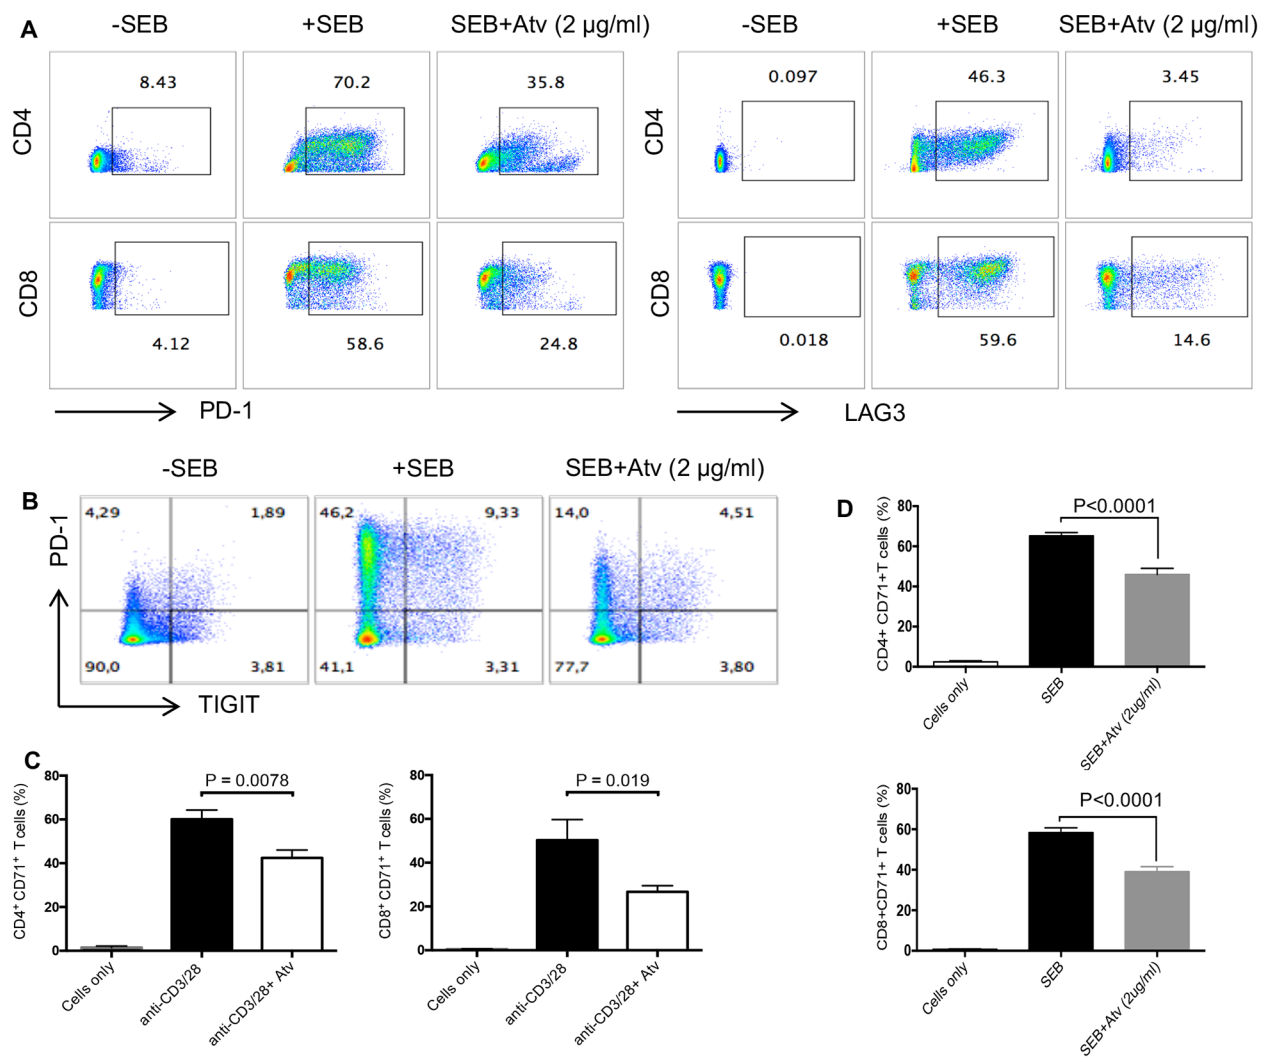

**Supplementary Figure 3:** (A) Representative dot plots showing expression of PD-1 and LAG-3 or (B) co-expression of TIGIT and PD-1 by CD4<sup>+</sup> and CD8<sup>+</sup> T cells in response to SEB stimulation with or without atorvastatin (2 µg/ml) after 72hrs. (C) Expression of CD71 by CD4<sup>+</sup> and CD8<sup>+</sup> T cells stimulated with α-CD3/CD28. (D) Expression of CD71 by CD4<sup>+</sup> and CD8<sup>+</sup> T cells stimulated with SEB for 48hrs. Data from three to five independent experiments are shown. Bar, mean ± one standard error.

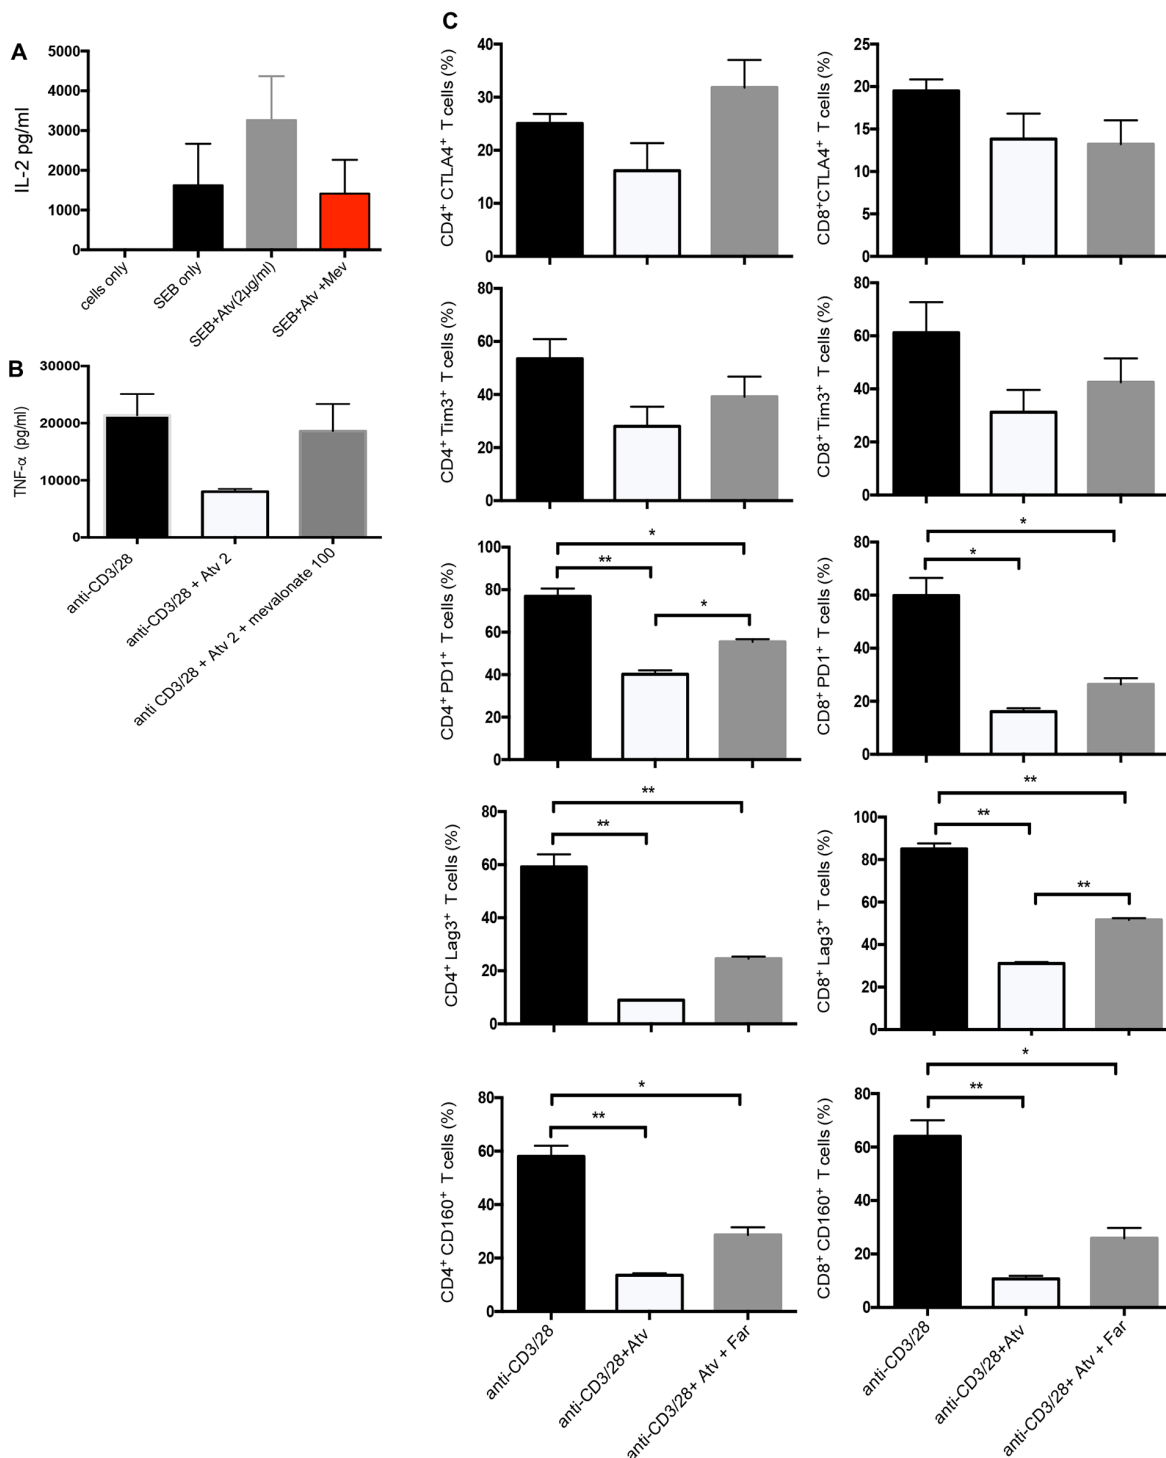

**Supplementary Figure 4: Effect of L-mevalonate and farnesyl on atorvastatin-treated cells.** (A) Concentration of IL-2 in cell culture supernatants from SEB-stimulated PBMCs treated with atorvastatin with or without L-mevalonate for 48 hrs. (B) TNF-α produced in response to α-CD3/CD28-stimulation (48hrs) in the presence of atorvastatin only or in combination with L-mevalonate. (C) Expression of co-inhibitory receptors by CD4+ and CD8+ T cells stimulated with α-CD3/CD28 with atorvastatin alone or in combination with farnesyl (5μM) for 48hrs.

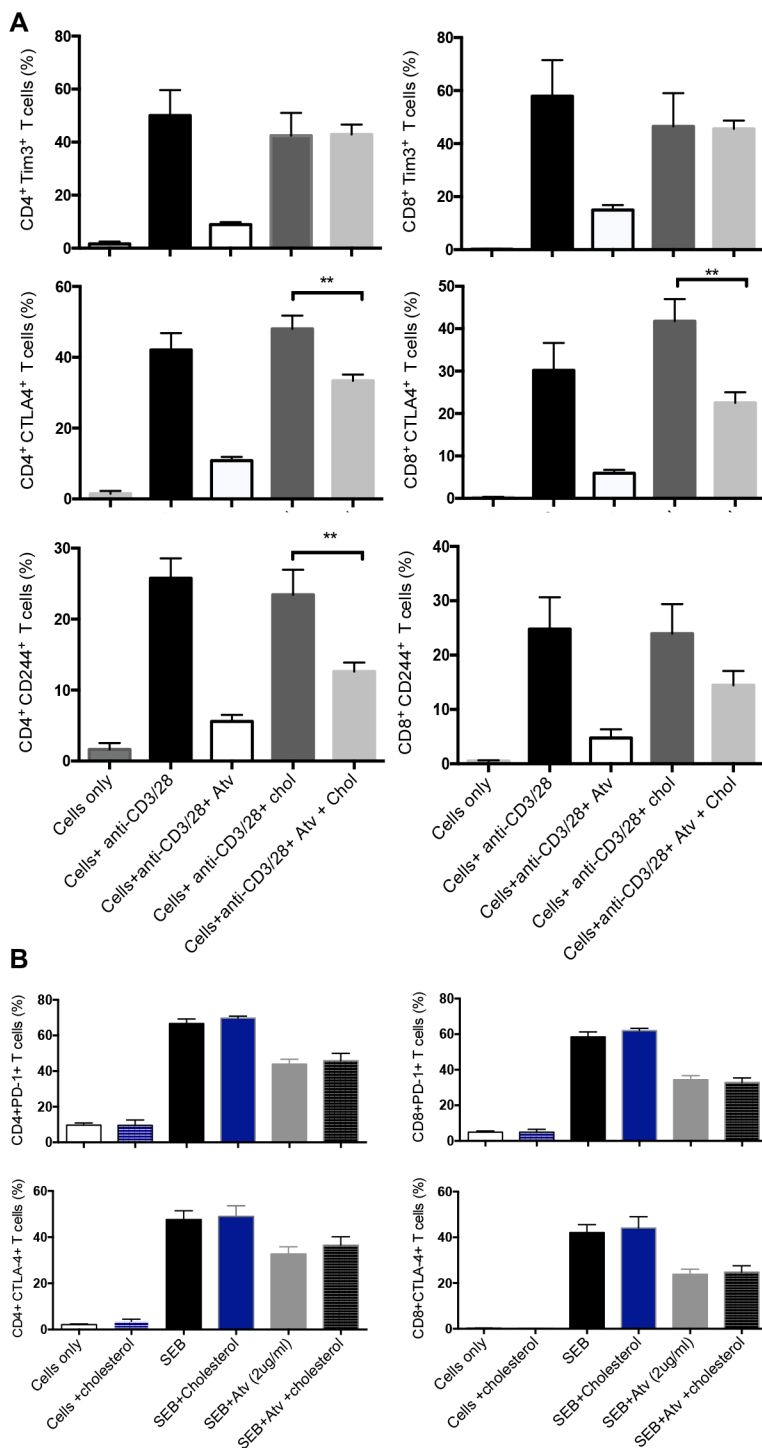

**Supplementary Figure 5: Effect of cholesterol on atorvastatin-treated cells. (A)** Expression of co-inhibitory receptors by CD4<sup>+</sup> and CD8<sup>+</sup> T cells stimulated with  $\alpha$ -CD3/CD28 with atorvastatin alone or in combination with cholesterol (200 $\mu$ M) for 48hrs. **(B)** Co-inhibitory receptor expression by SEB-stimulated CD4<sup>+</sup> and CD8<sup>+</sup> T cells treated with atorvastatin, alone or in combination with cholesterol for 72hrs. Data from three independent experiments are shown. Bar, mean  $\pm$  one standard error. P values are defined by \* ( $P \leq 0.05$ ) and \*\* ( $P < 0.01$ ).

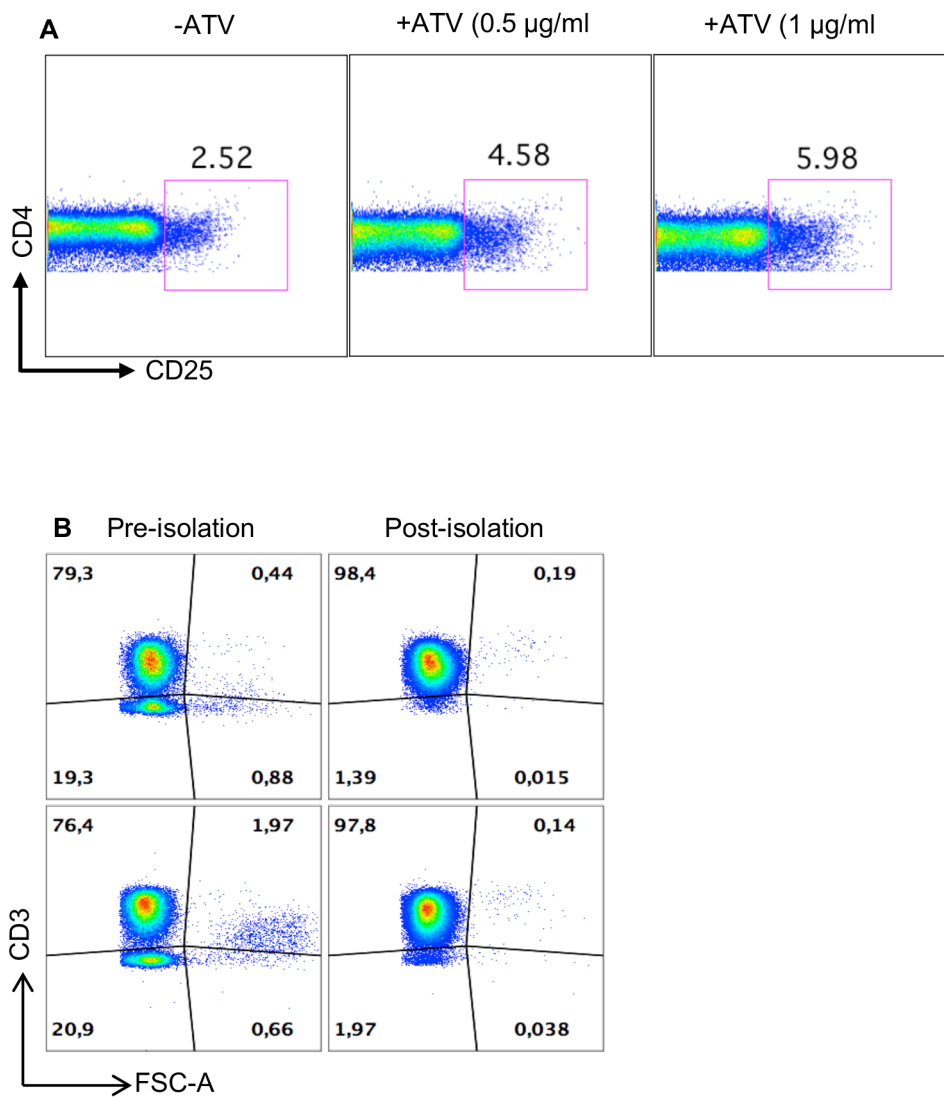

**Supplementary Figure 6:** (A) Representative plots showing expression of CD25 on CD4 T cells in the presence of atorvastatin. (B) Two representative dot plots showing purity of CD3<sup>+</sup> T cells pre- and post-T cell isolation using immunomagnetic negative selection.
